# Supplementary material for: Deletion of SERF2 in mice delays embryonic development and alters amyloid deposit structure in the brain
Source: PubMed Central journal article supplement (PMC10155860; doi:10.26508/lsa.202201730), 2023-05-02

AM

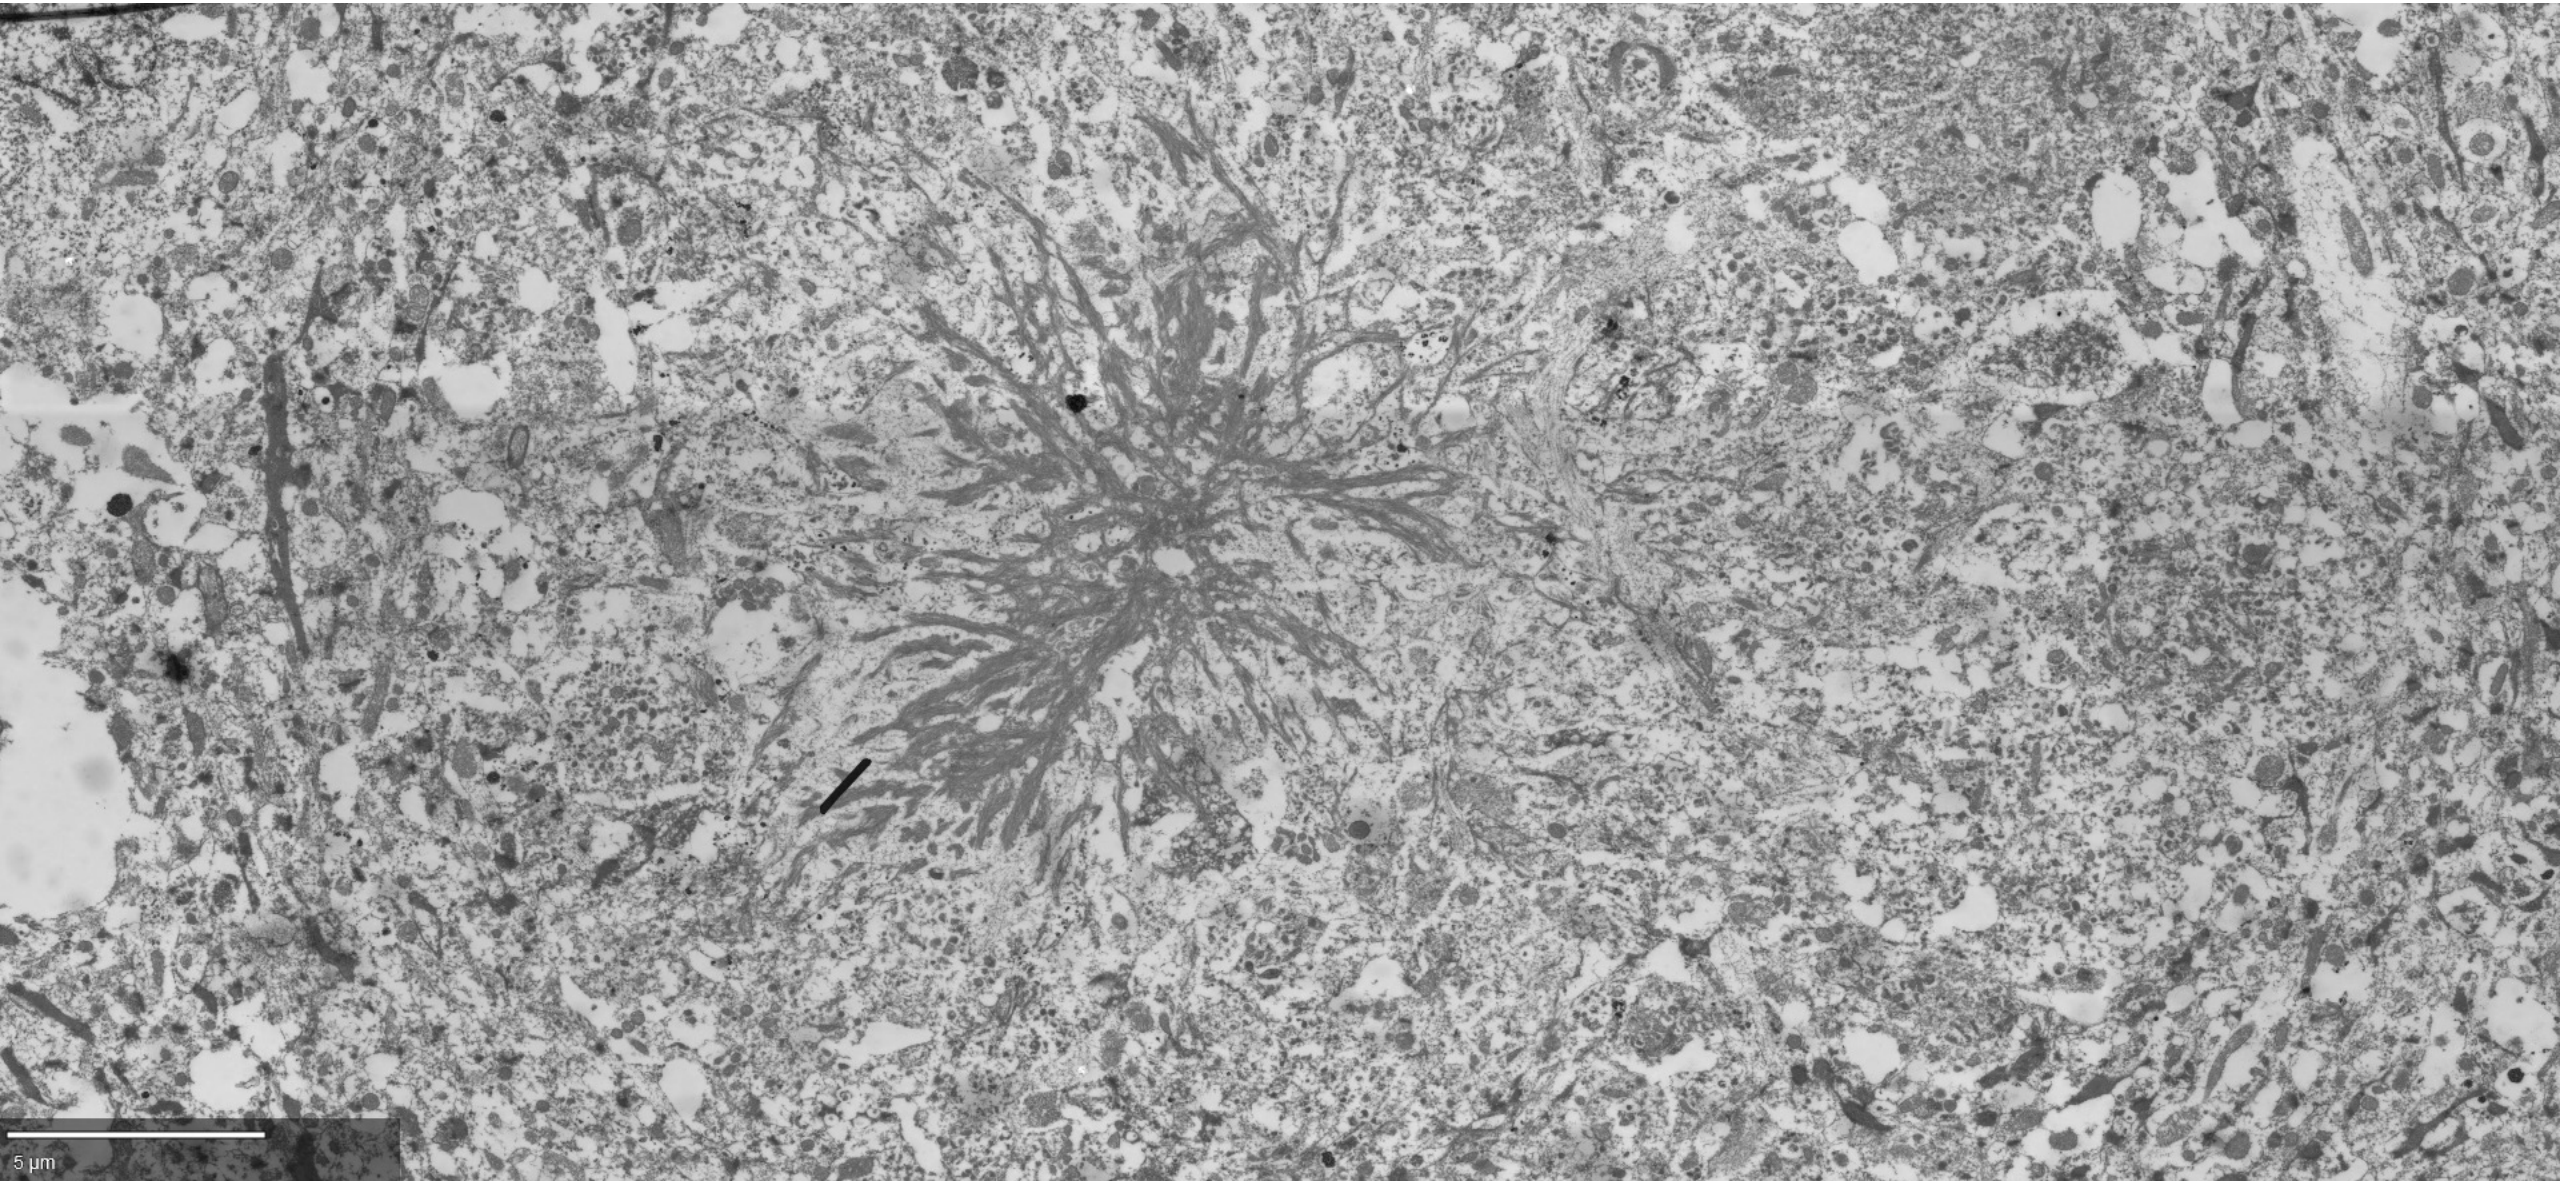

5 μm

AM; serf -/-

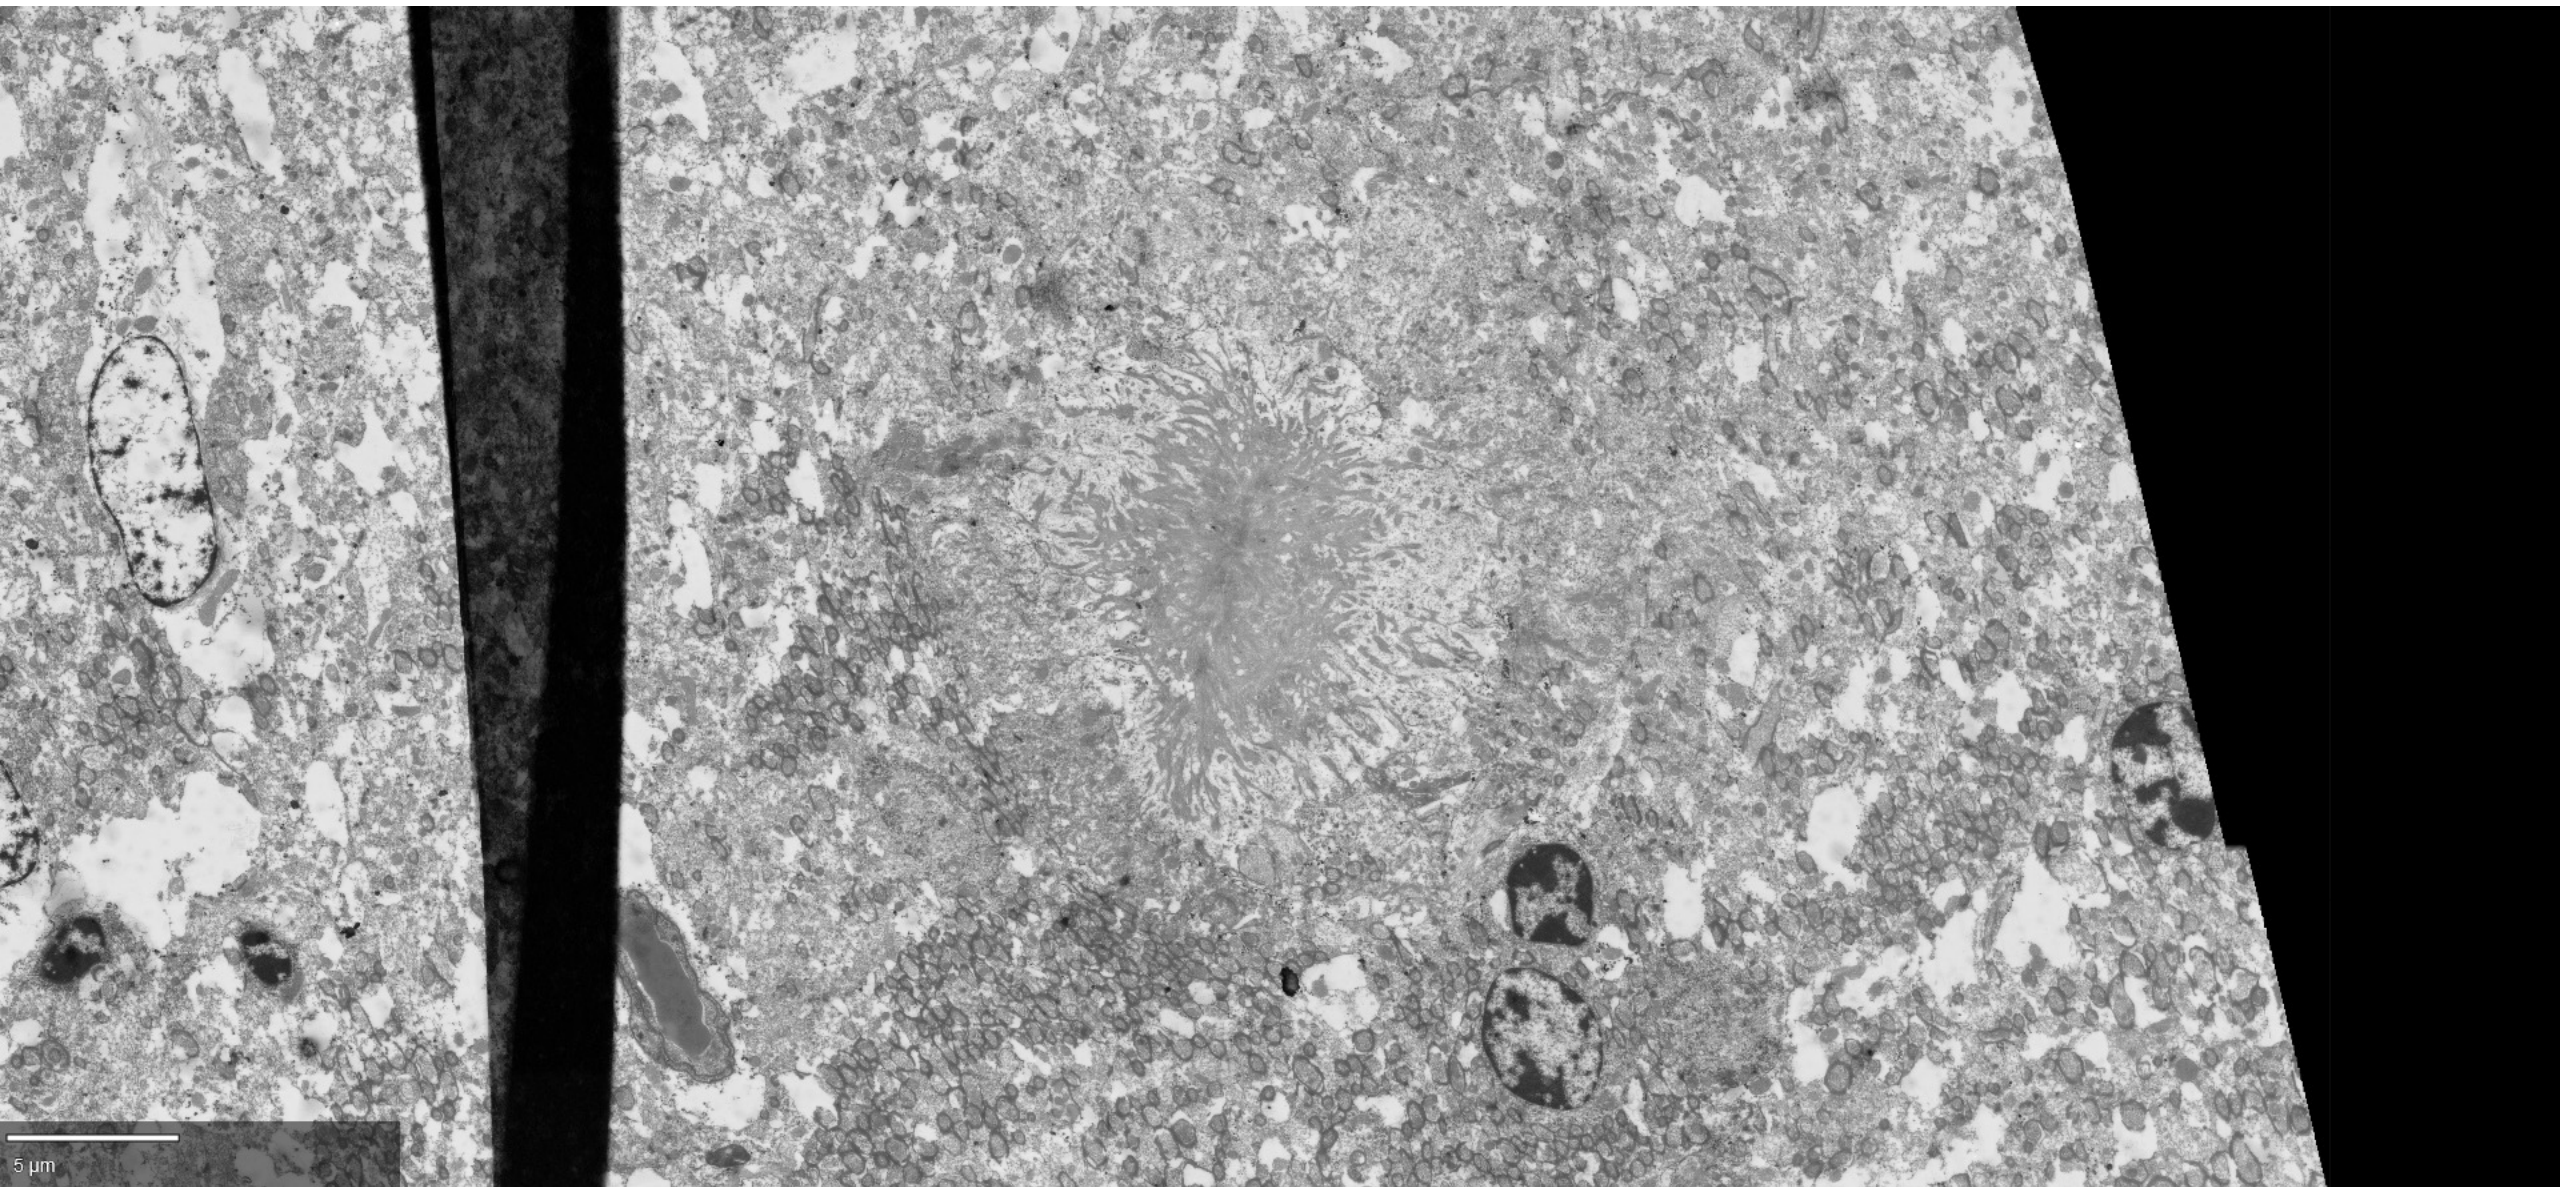



WT

KO

1

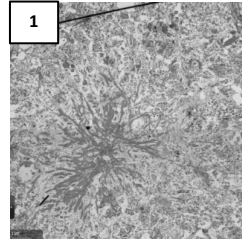

8

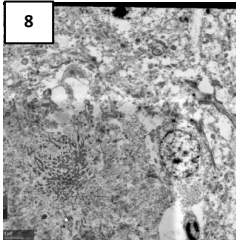

4

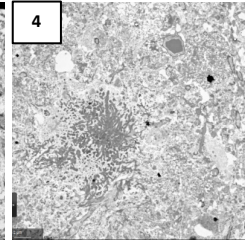

4

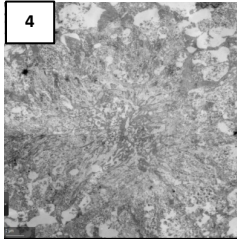

2

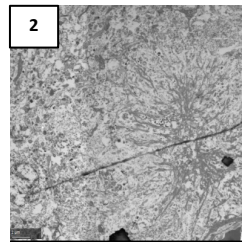

9

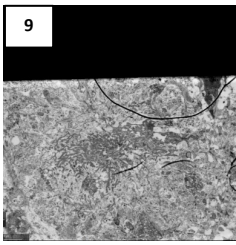

5

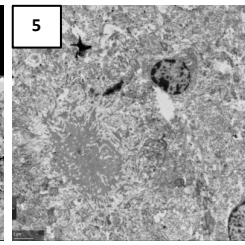

10

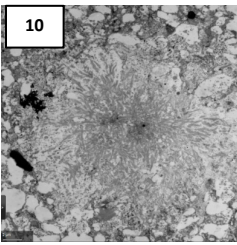

3

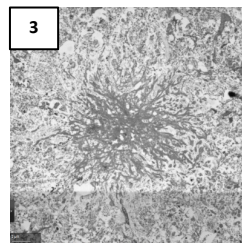

14

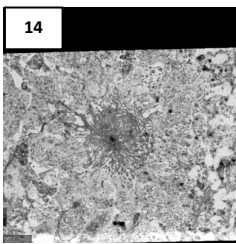

6

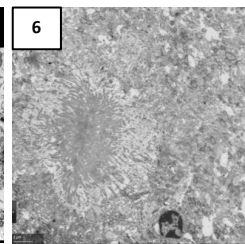

16

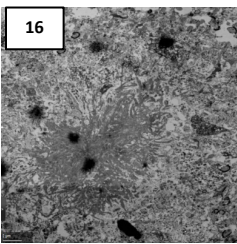

11

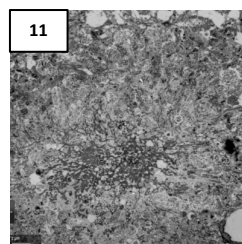

13

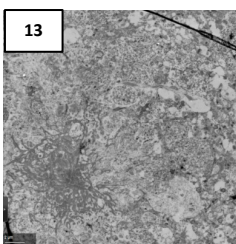

15

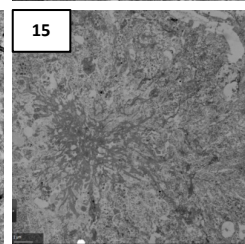

12

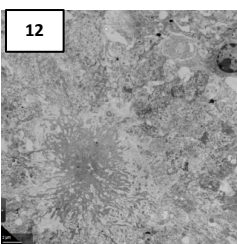

17

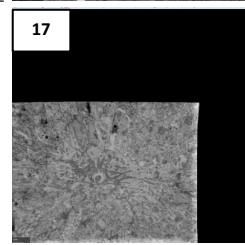

WT

KO

1

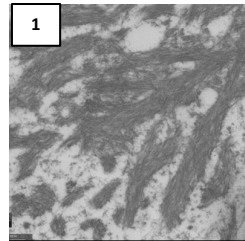

8

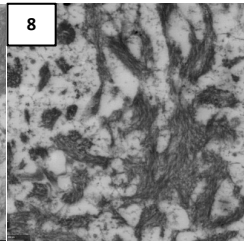

4

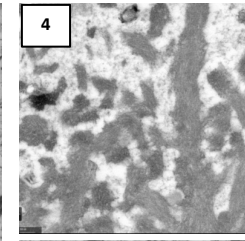

7

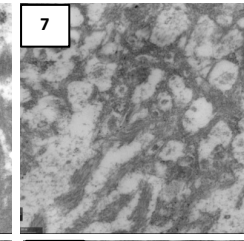

2

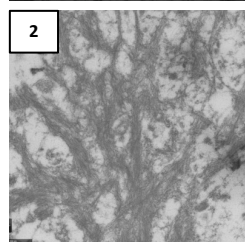

9

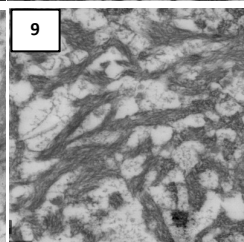

5

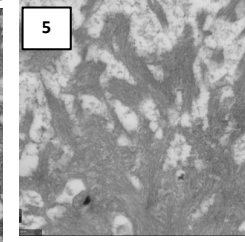

10

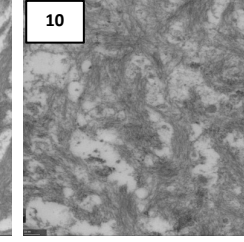

3

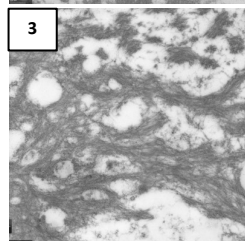

14

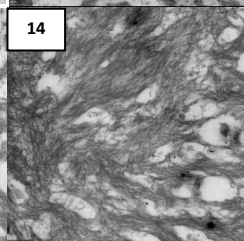

6

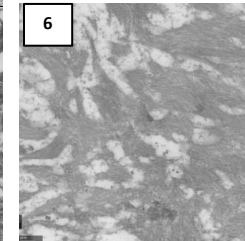

16

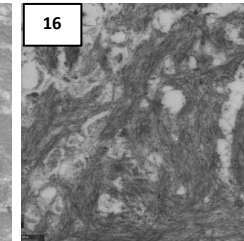

11

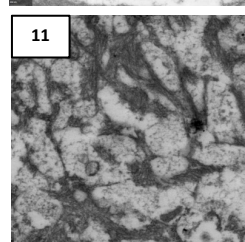

13

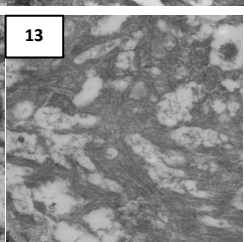

15

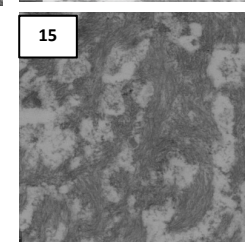

12

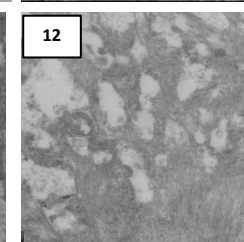

17

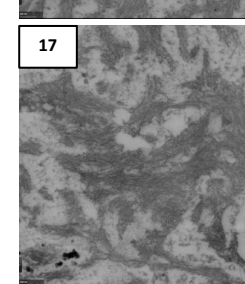

Supplement: LSA-2022-01730_SdataF6.1.pdf [file LSA-2022-01730_SdataF6.1.pdf]
