# Supplementary material for: Deletion of SERF2 in mice delays embryonic development and alters amyloid deposit structure in the brain
Source: PubMed Central journal article supplement (PMC10155860; doi:10.26508/lsa.202201730), 2023-05-02

Figure 1D

Anti-serf-2

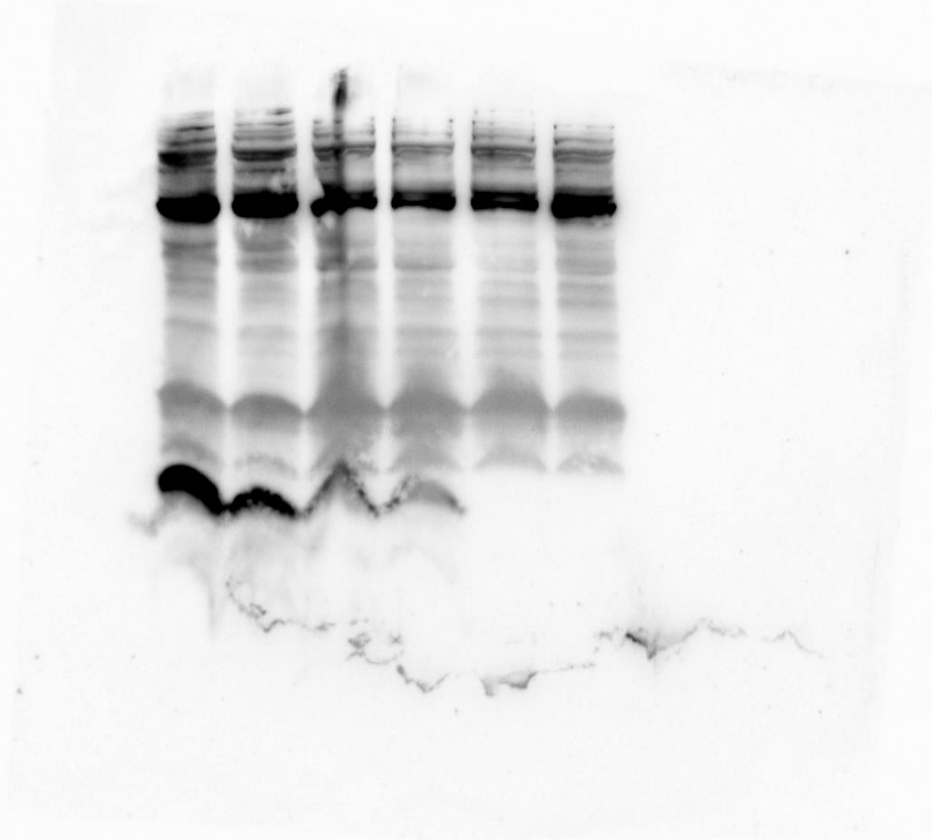

Anti- beta-actin

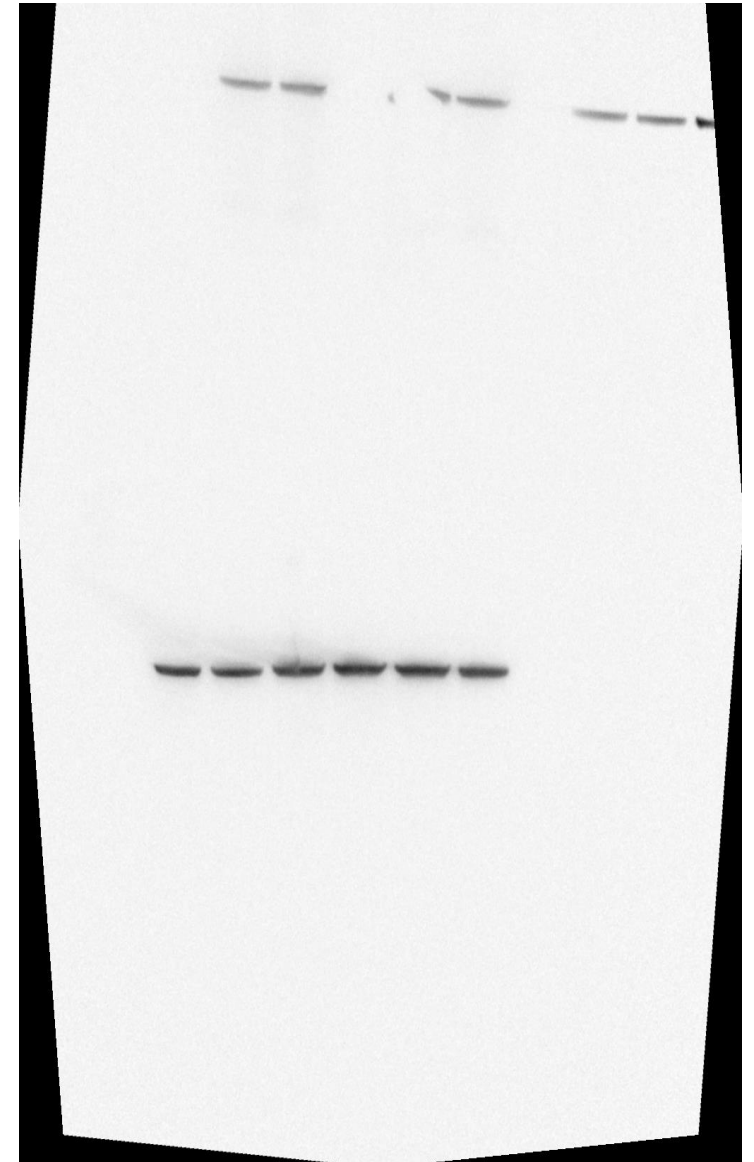

Figure 1F  
Wt

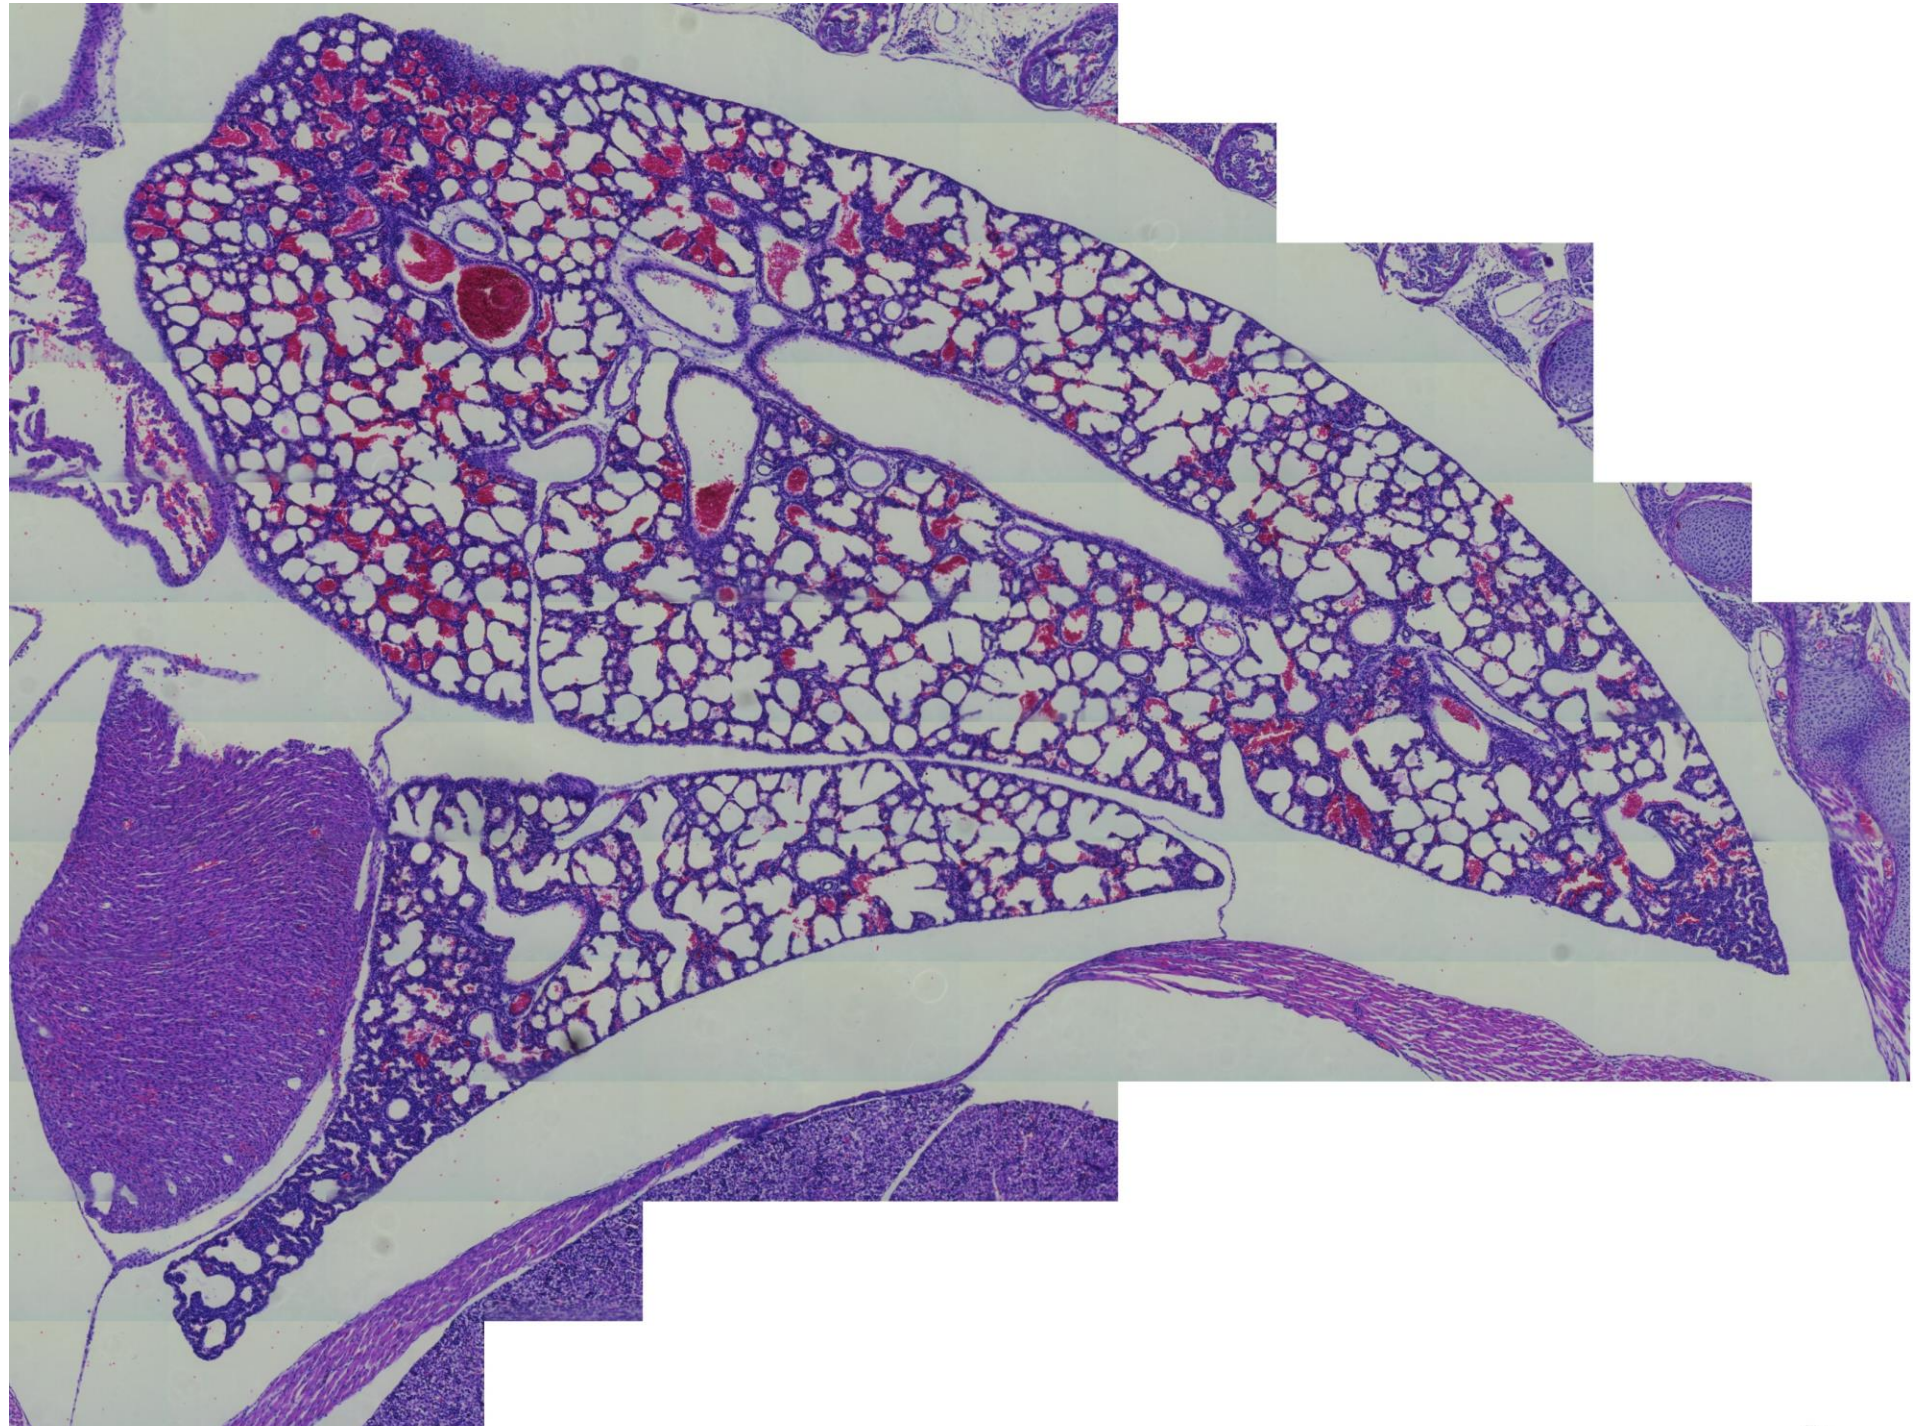



Figure 1F  
Serf -/-

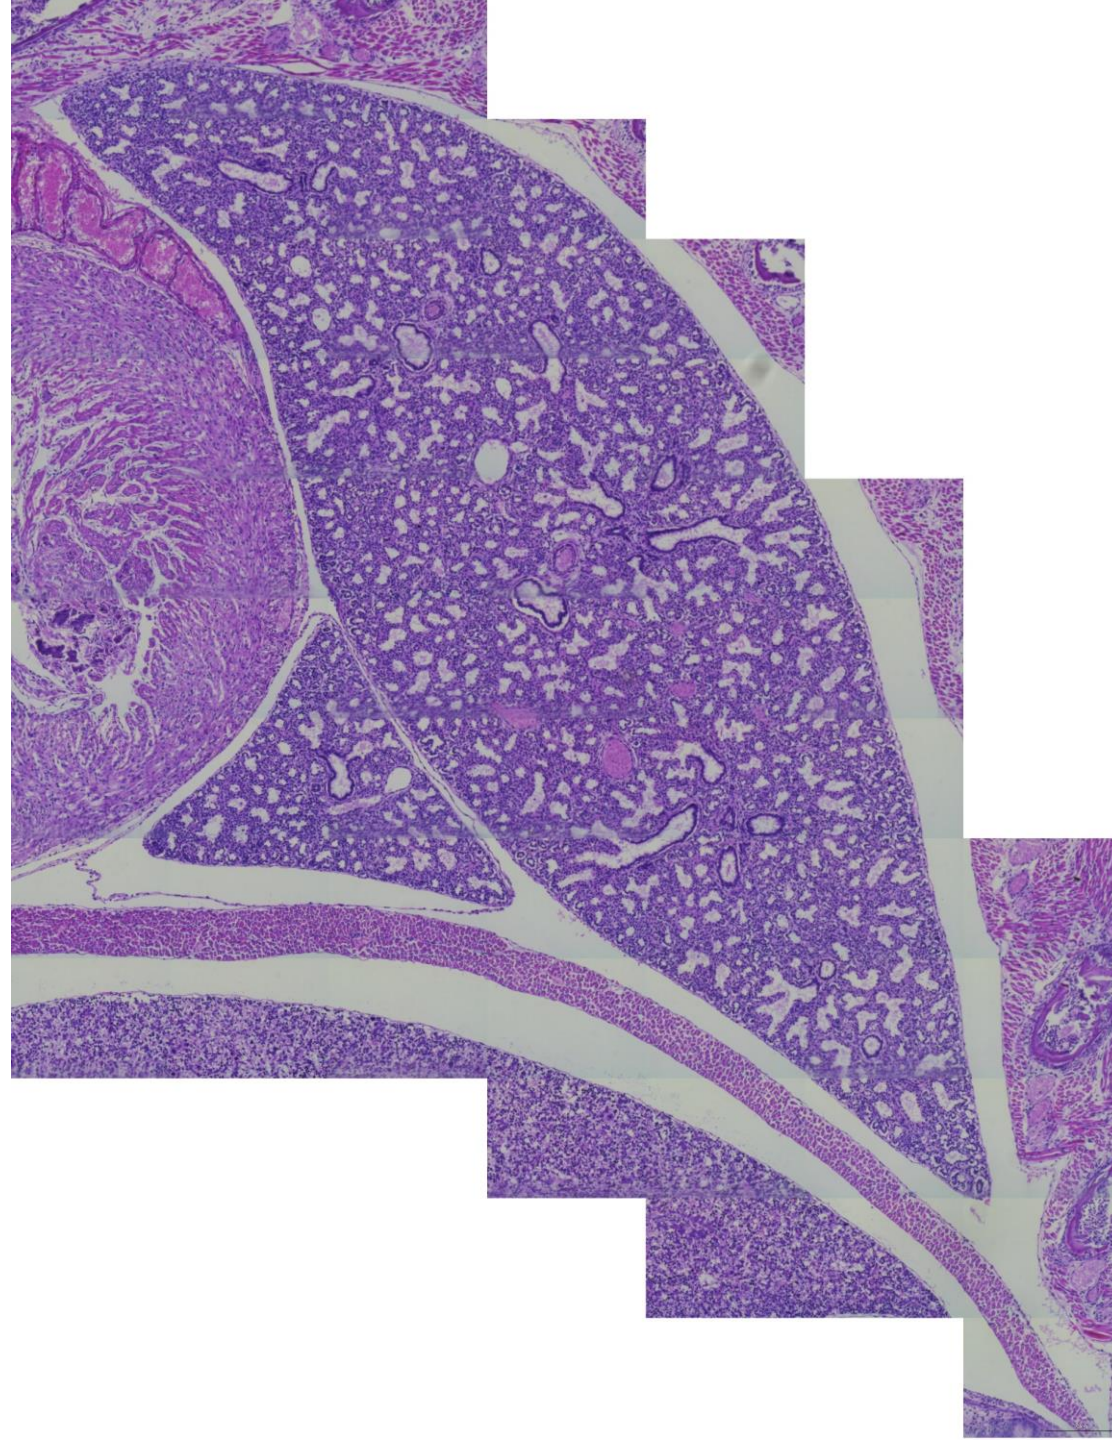

Supplement: LSA-2022-01730_SdataF1.2.pdf [file LSA-2022-01730_SdataF1.2.pdf]
